# Supplementary material for: Growth of polygonal rings and wires of CuS on structured surfaces
Source: Royal Society of Chemistry journal article supplement (doi:10.1039/c0ce00499e), 2010-11-01
Supplement: c0ce00499e.pdf [file c0ce00499e.pdf]

## Supplementary Information

“Growth of polygonal rings and wires of CuS on structured surfaces”

Yolanda Vasquez,<sup>1, 2</sup> Erin M. Fenton,<sup>3</sup> Victoria F. Chernow,<sup>1</sup> Joanna Aizenberg<sup>1, 2, 4,\*</sup>

Department of Chemistry and Chemical Biology, Harvard University, Cambridge;  
<sup>2</sup>School of Engineering and Applied Sciences, Harvard University, Cambridge, MA,  
USA; <sup>3</sup>Center for Biomedical Engineering and Department of Chemical and Nuclear  
Engineering, University of New Mexico, Albuquerque, NM, USA; <sup>4</sup>Wyss Institute for  
Biologically Inspired Materials, Harvard University, Cambridge, MA, USA.

\*E-mail: [jaiz@seas.harvard.edu](mailto:jaiz@seas.harvard.edu)

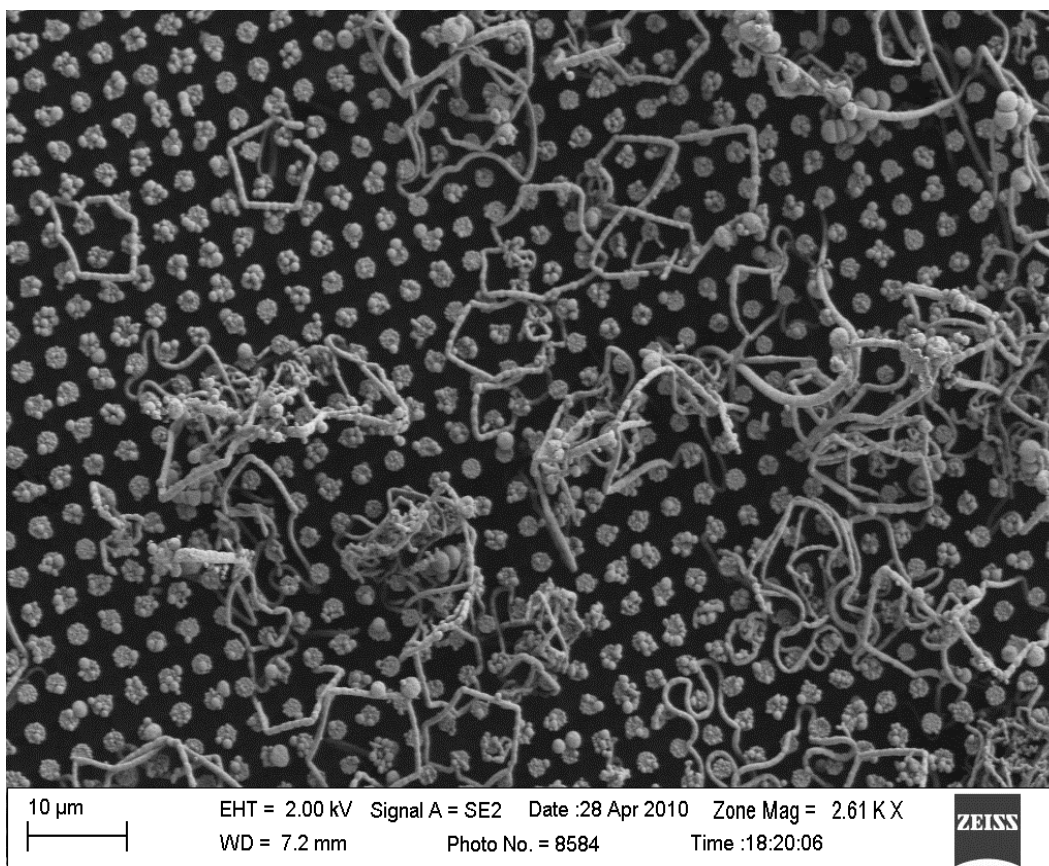

SI 1. Large area polygonal rings on micropillar arrays.
